# Supplementary material
Source: publisher figshare collection journal article supplement (https://acs.figshare.com/ndownloader/files/5707896)
Supplement: Supplementary file 1 [file 5707896]

# ic9705958.cif

data_no5
_audit_creation_date               97-05-10
_audit_update_record
;
?   
;
_audit_creation_method              'manual editing'
_chemical_name_systematic                                                #ActaC
;                                                                          
{N,N'-di-3-ethoxysalicylidene-(R,S)(S,R)-1,2-diphenyl-1,2-ethanediamine}
oxovanadium
;
_chemical_formula_structural       ?                                     #ActaC
_chemical_formula_sum              'C32 H32 N2 O6 V1    ' 


_chemical_compound_source        'Local laboratory'
_exptl_crystal_description       'prism'
_exptl_crystal_colour            'green'
_exptl_crystal_size_max           0.7
_exptl_crystal_size_mid           0.2
_exptl_crystal_size_min           0.2
_chemical_formula_moiety          '(C32 H30 N2 O5 V)(H2 O)'
_chemical_formula_weight          591.6
_cell_length_a                    16.528(2)
_cell_length_b                    11.031(2)
_cell_length_c                    17.189(2)
_cell_angle_alpha                 90.000000(0)
_cell_angle_beta                  112.482(8)
_cell_angle_gamma                 90.000000(0)
_cell_volume                      2895.8(7)
_cell_measurement_reflns_used     '25'
_cell_measurement_theta_min       '14.570'
_cell_measurement_theta_max       '15.005'
_cell_formula_units_Z             4
_exptl_crystal_density_diffrn     1.357
_exptl_crystal_density_meas        ?
_exptl_crystal_F_000              1236.0
_exptl_absorpt_correction_T_min   0.9215                                #ActaC
_exptl_absorpt_correction_T_max   0.9374                                #ActaC
_exptl_absorpt_process_details                                          #ActaC
;(Coppens, Leiserowitz & Rabinovich, 1965)                     
;
_exptl_crystal_density_method     'not measured'                        #ActaC

_diffrn_measurement_device_type    'Rigaku AFC-5'                       #ActaC
_diffrn_standards_number           3                                    #ActaC
_diffrn_standards_interval_count   100                                  #ActaC
_diffrn_standards_decay_%          4                                    #ActaC
 
_refine_ls_abs_structure_Flack     ?                                    #ActaC
_refine_ls_abs_structure_details   ?                                    #ActaC
_refine_ls_weighting_scheme       calc                                  #ActaC
_refine_ls_weighting_details     'w=1/[\s ^2^(F) + 0.000225F^2^]'       #ActaC
_reflns_threshold_expression     '|F~o~| > 3\s(|F~o~|)'                 #ActaC

_diffrn_radiation_type           'Mo K\a'
_diffrn_radiation_wavelength      0.71073
_exptl_absorpt_coefficient_mu     0.390
_cell_measurement_temperature     '298'
_diffrn_measurement_method       '\q-2\q scans'
_exptl_absorpt_correction_type   'integration'
_diffrn_reflns_number             6891
_reflns_number_total              6664
_reflns_number_observed           4029
_diffrn_reflns_av_R_equivalents   0.014
_diffrn_reflns_theta_max          27.5
_diffrn_reflns_limit_h_min        0
_diffrn_reflns_limit_h_max        21
_diffrn_reflns_limit_k_min        0
_diffrn_reflns_limit_k_max        14
_diffrn_reflns_limit_l_min        -22
_diffrn_reflns_limit_l_max        22
_refine_ls_structure_factor_coef  F
_refine_ls_R_factor_obs           0.061
_refine_ls_wR_factor_obs          0.049
_refine_ls_hydrogen_treatment    'refU'
_refine_ls_number_reflns          4029
_refine_ls_number_parameters      402
_refine_ls_goodness_of_fit_obs    1.28
_refine_ls_shift/esd_max          0.04
_refine_ls_shift/esd_mean          0.0035
_refine_diff_density_min          -0.47
_refine_diff_density_max          0.45
_refine_ls_extinction_method     'None'
_atom_type_scat_source     'International Tables Vol.IV(1974)'
_computing_cell_refinement    
; AFC/MSC Diffractometer Control System  
(Rigaku Corporation, 1993)
;
_computing_data_collection 
; AFC/MSC Diffractometer Control System  
;
_computing_data_reduction      'local programs'
_computing_structure_solution  
; CRYSTAN-GM (Edwards, Gilmore, Mackay & Stewart, 1995)
;
_computing_structure_refinement  'CRYSTAN-GM'
_computing_molecular_graphics    'CRYSTAN-GM'
_computing_publication_material  'CRYSTAN-GM'

_symmetry_space_group_name_H-M 'P 1 21/n 1    '
_symmetry_cell_setting 'Monoclinic'
#==================================================
  
# Atomic Coordinates and Thermal Parameters
 
loop_
_atom_site_label
_atom_site_fract_x
_atom_site_fract_y
_atom_site_fract_z
_atom_site_U_iso_or_equiv
_atom_site_occupancy
_atom_site_thermal_displace_type
  V1         0.70920(3)    0.14475(5)    0.23061(3)    0.0428(2)   1.000 Uij 
  O2         0.7343(1)     0.2852(2)     0.2429(1)     0.0576(9)   1.000 Uij 
  O3         0.5829(1)     0.1348(2)     0.1793(1)     0.0550(9)   1.000 Uij 
  O4         0.6997(1)     0.0878(2)     0.3326(1)     0.0577(9)   1.000 Uij 
  O5         0.4196(2)     0.1985(3)     0.1488(2)     0.100(1)    1.000 Uij 
  O6         0.6620(2)     0.0919(2)     0.4665(1)     0.085(1)    1.000 Uij 
  O41        0.5492(2)     0.2585(3)     0.3202(2)     0.104(1)    1.000 Uij 
  N7         0.7105(2)     0.0912(2)     0.1156(1)     0.044(1)    1.000 Uij 
  N8         0.8269(2)     0.0535(2)     0.2660(1)     0.042(1)    1.000 Uij 
  C9         0.5311(2)     0.1530(3)     0.1003(2)     0.048(1)    1.000 Uij 
  C10        0.4428(2)     0.1856(3)     0.0810(2)     0.062(1)    1.000 Uij 
  C11        0.3404(4)     0.1782(9)     0.1431(4)     0.221(4)    1.000 Uij 
  C12        0.3282(4)     0.1783(9)     0.2239(4)     0.173(4)    1.000 Uij 
  C13        0.3862(2)     0.2045(3)    -0.0014(2)     0.059(1)    1.000 Uij 
  C14        0.4139(2)     0.1889(3)    -0.0672(2)     0.057(1)    1.000 Uij 
  C15        0.4973(2)     0.1549(3)    -0.0511(2)     0.055(1)    1.000 Uij 
  C16        0.5579(2)     0.1377(3)     0.0325(2)     0.045(1)    1.000 Uij 
  C17        0.6440(2)     0.0972(3)     0.0448(2)     0.050(1)    1.000 Uij 
  C18        0.7898(2)     0.0271(3)     0.1156(2)     0.051(1)    1.000 Uij 
  C19        0.8160(2)     0.0550(3)     0.0422(2)     0.052(1)    1.000 Uij 
  C20        0.8052(2)     0.1668(3)     0.0036(2)     0.078(2)    1.000 Uij 
  C21        0.8328(3)     0.1872(4)    -0.0616(3)     0.090(2)    1.000 Uij 
  C22        0.8740(3)     0.0973(4)    -0.0877(3)     0.095(2)    1.000 Uij 
  C23        0.8860(3)    -0.0123(4)    -0.0497(2)     0.089(2)    1.000 Uij 
  C24        0.8569(2)    -0.0348(3)     0.0146(2)     0.068(2)    1.000 Uij 
  C25        0.8663(2)     0.0443(3)     0.2017(2)     0.052(1)    1.000 Uij 
  C26        0.9298(2)     0.1472(4)     0.2091(2)     0.059(1)    1.000 Uij 
  C27        0.9081(3)     0.2695(4)     0.2049(2)     0.087(2)    1.000 Uij 
  C28        0.9700(3)     0.3591(5)     0.2152(3)     0.112(2)    1.000 Uij 
  C29        1.0540(4)     0.3259(6)     0.2291(3)     0.123(3)    1.000 Uij 
  C30        1.0771(3)     0.2067(6)     0.2327(3)     0.106(3)    1.000 Uij 
  C31        1.0154(2)     0.1177(4)     0.2224(2)     0.076(2)    1.000 Uij 
  C32        0.8654(2)    -0.0036(3)     0.3358(2)     0.048(1)    1.000 Uij 
  C33        0.8384(2)    -0.0081(3)     0.4057(2)     0.046(1)    1.000 Uij 
  C34        0.8949(2)    -0.0647(3)     0.4808(2)     0.057(2)    1.000 Uij 
  C35        0.8740(3)    -0.0685(3)     0.5496(2)     0.065(2)    1.000 Uij 
  C36        0.7963(3)    -0.0180(3)     0.5471(2)     0.074(2)    1.000 Uij 
  C37        0.7393(2)     0.0367(3)     0.4749(2)     0.060(1)    1.000 Uij 
  C38        0.6319(3)     0.0873(5)     0.5329(3)     0.099(2)    1.000 Uij 
  C39        0.5446(3)     0.1473(5)     0.5037(3)     0.119(3)    1.000 Uij 
  C40        0.7584(2)     0.0402(3)     0.4012(2)     0.051(1)    1.000 Uij 
  H41A       0.52757       0.24816       0.26017       0.25(3)     1.000 Uiso
  H41B       0.58677       0.19346       0.35027       0.23(3)     1.000 Uiso
  H39A       0.52387       0.14381       0.54877       0.11(1)     1.000 Uiso
  H39B       0.50427       0.10621       0.45507       0.15(2)     1.000 Uiso
  H39C       0.54977       0.23021       0.48927       0.14(2)     1.000 Uiso
  H38A       0.67217       0.12844       0.58150       0.11(1)     1.000 Uiso
  H38B       0.62667       0.00444       0.54730       0.12(2)     1.000 Uiso
  H36        0.78214      -0.02111       0.59632       0.047(8)    1.000 Uiso
  H35        0.91317      -0.10619       0.60030       0.08(1)     1.000 Uiso
  H34        0.94852      -0.10086       0.48292       0.06(1)     1.000 Uiso
  H32        0.91747      -0.04768       0.34170       0.039(8)    1.000 Uiso
  H25        0.90583      -0.02327       0.21356       0.045(8)    1.000 Uiso
  H31        1.03202       0.03395       0.22399       0.06(1)     1.000 Uiso
  H30        1.13655       0.18479       0.24275       0.08(1)     1.000 Uiso
  H12A       0.26918       0.16421       0.21911       0.24(3)     1.000 Uiso
  H12B       0.34718       0.25471       0.25161       0.26(4)     1.000 Uiso
  H12C       0.36458       0.11501       0.25792       0.23(4)     1.000 Uiso
  H11A       0.32138       0.10181       0.11543       0.22(3)     1.000 Uiso
  H11B       0.30398       0.24151       0.10913       0.76(14)    1.000 Uiso
  H13        0.32690       0.22876      -0.01316       0.059(9)    1.000 Uiso
  H14        0.37399       0.20205      -0.12423       0.08(1)     1.000 Uiso
  H15        0.51577       0.14235      -0.09711       0.049(8)    1.000 Uiso
  H17        0.65361       0.07210      -0.00453       0.037(8)    1.000 Uiso
  H27        0.84877       0.29233       0.19459       0.07(1)     1.000 Uiso
  H28        0.95414       0.44325       0.21229       0.12(2)     1.000 Uiso
  H29        1.09754       0.38733       0.23660       0.12(2)     1.000 Uiso
  H18        0.77952      -0.05849       0.11566       0.035(8)    1.000 Uiso
  H24        0.86513      -0.11357       0.04012       0.06(1)     1.000 Uiso
  H23        0.91523      -0.07534      -0.06736       0.08(1)     1.000 Uiso
  H22        0.89380       0.11206      -0.13260       0.07(1)     1.000 Uiso
  H21        0.82350       0.26507      -0.08848       0.08(1)     1.000 Uiso
  H20        0.77776       0.23117       0.02214       0.06(1)     1.000 Uiso


loop_
_atom_site_aniso_label
_atom_site_aniso_U_11
_atom_site_aniso_U_22
_atom_site_aniso_U_33
_atom_site_aniso_U_12
_atom_site_aniso_U_13
_atom_site_aniso_U_23
 V1      0.0404(3) 0.0437(3) 0.0308(2) 0.0055(3) 0.0065(2) -.0014(3)
 O2      0.059(1)  0.040(1)  0.052(1)  0.006(1)  0.010(1) -0.004(1)
 O3      0.042(1)  0.072(2)  0.035(1)  0.004(1)  0.007(1) -0.003(1)
 O4      0.055(1)  0.071(2)  0.040(1)  0.014(1)  0.018(1)  0.011(1)
 O5      0.048(2)  0.142(3)  0.066(2) -0.001(2)  0.016(1) -0.025(2)
 O6      0.091(2)  0.093(2)  0.055(1)  0.012(2)  0.042(1)  0.011(1)
 O41     0.099(2)  0.093(2)  0.073(2)  0.007(2)  0.030(2) -0.019(2)
 N7      0.044(1)  0.040(2)  0.032(1)  0.002(1)  0.009(1) -0.003(1)
 N8      0.043(1)  0.036(1)  0.035(1)  0.006(1)  0.008(1)  0.000(1)
 C9      0.041(2)  0.040(2)  0.044(2) -0.002(2)  0.005(1) -0.003(2)
 C10     0.048(2)  0.056(2)  0.055(2)  0.001(2)  0.013(2) -0.012(2)
 C11     0.107(4)  0.307(9)  0.128(5) -0.072(6)  0.079(4) -0.090(6)
 C12     0.089(4)  0.234(7)  0.121(4) -0.007(5)  0.066(3) -0.045(6)
 C13     0.041(2)  0.052(2)  0.066(2)  0.006(2)  0.000(2) -0.001(2)
 C14     0.060(2)  0.053(2)  0.045(2)  0.000(2) -0.003(2)  0.006(2)
 C15     0.059(2)  0.050(2)  0.039(2) -0.007(2)  0.006(1)  0.000(2)
 C16     0.044(2)  0.038(2)  0.038(2) -0.003(2)  0.005(1) -0.001(2)
 C17     0.052(2)  0.044(2)  0.036(2) -0.004(2)  0.014(1) -0.004(1)
 C18     0.051(2)  0.039(2)  0.043(2)  0.005(2)  0.017(1) -0.004(1)
 C19     0.046(2)  0.052(2)  0.039(2)  0.001(2)  0.014(1) -0.006(2)
 C20     0.082(3)  0.054(3)  0.070(2)  0.006(2)  0.038(2) -0.002(2)
 C21     0.101(3)  0.076(3)  0.082(3)  0.008(2)  0.053(3)  0.021(2)
 C22     0.093(3)  0.104(4)  0.070(3)  0.013(3)  0.052(2)  0.011(3)
 C23     0.091(3)  0.087(3)  0.064(2)  0.029(3)  0.043(2)  0.002(2)
 C24     0.070(2)  0.065(3)  0.051(2)  0.017(2)  0.025(2)  0.003(2)
 C25     0.042(2)  0.055(2)  0.043(2)  0.014(2)  0.013(1) -0.002(2)
 C26     0.046(2)  0.076(3)  0.035(2) -0.003(2)  0.014(1) -0.006(2)
 C27     0.064(3)  0.076(3)  0.080(3) -0.016(2)  0.036(2) -0.018(2)
 C28     0.098(3)  0.096(4)  0.093(3) -0.032(3)  0.055(3) -0.020(3)
 C29     0.093(4)  0.153(6)  0.079(3) -0.052(4)  0.045(3) -0.015(3)
 C30     0.048(3)  0.178(6)  0.080(3) -0.006(4)  0.030(2)  0.010(4)
 C31     0.053(2)  0.104(4)  0.059(2)  0.011(2)  0.025(2)  0.010(2)
 C32     0.045(2)  0.036(2)  0.046(2)  0.003(2)  0.007(1) -0.001(2)
 C33     0.051(2)  0.036(2)  0.038(2) -0.005(2)  0.006(1)  0.001(1)
 C34     0.064(2)  0.047(2)  0.048(2)  0.003(2)  0.007(2)  0.007(2)
 C35     0.079(3)  0.068(3)  0.041(2) -0.003(2)  0.004(2)  0.015(2)
 C36     0.093(3)  0.071(3)  0.040(2) -0.013(2)  0.026(2)  0.004(2)
 C37     0.066(2)  0.054(2)  0.043(2) -0.006(2)  0.019(2)  0.001(2)
 C38     0.087(3)  0.107(4)  0.073(3) -0.024(3)  0.045(3) -0.002(3)
 C39     0.115(4)  0.088(3)  0.113(4) -0.011(3)  0.082(3) -0.003(3)
 C40     0.056(2)  0.043(2)  0.037(2) -0.006(2)  0.010(2)  0.001(2)

loop_
   _geom_bond_atom_site_label_1 
   _geom_bond_atom_site_label_2
   _geom_bond_distance  
   _geom_bond_site_symmetry_1
   _geom_bond_site_symmetry_2
   _geom_bond_publ_flag 
 V1    O2       1.597(3) . . yes
 V1    O3       1.934(2) . . yes
 V1    O4       1.925(3) . . yes
 V1    N7       2.072(3) . . yes
 V1    N8       2.065(3) . . yes
 O3    C9       1.315(4) . . yes
 O4    C40      1.316(4) . . yes
 O5    C10      1.366(4) . . yes
 O5    C11      1.295(7) . . yes
 O6    C37      1.372(5) . . yes
 O6    C38      1.409(5) . . yes
 N7    C17      1.292(4) . . yes
 N7    C18      1.490(4) . . yes
 N8    C25      1.487(4) . . yes
 N8    C32      1.287(4) . . yes
 C9    C10      1.413(5) . . yes
 C9    C16      1.407(4) . . yes
 C10   C13      1.382(5) . . yes
 C11   C12      1.477(9) . . yes
 C13   C14      1.385(5) . . yes
 C14   C15      1.351(5) . . yes
 C15   C16      1.415(4) . . yes
 C16   C17      1.428(5) . . yes
 C18   C19      1.513(5) . . yes
 C18   C25      1.547(5) . . yes
 C19   C20      1.379(5) . . yes
 C19   C24      1.381(5) . . yes
 C20   C21      1.381(6) . . yes
 C21   C22      1.372(7) . . yes
 C22   C23      1.353(7) . . yes
 C23   C24      1.386(5) . . yes
 C25   C26      1.517(5) . . yes
 C26   C27      1.391(6) . . yes
 C26   C31      1.384(5) . . yes
 C27   C28      1.385(7) . . yes
 C28   C29      1.366(8) . . yes
 C29   C30      1.364(10) . . yes
 C30   C31      1.378(8) . . yes
 C32   C33      1.433(4) . . yes
 C33   C34      1.416(5) . . yes
 C33   C40      1.400(5) . . yes
 C34   C35      1.354(5) . . yes
 C35   C36      1.384(6) . . yes
 C36   C37      1.378(5) . . yes
 C37   C40      1.419(5) . . yes
 C38   C39      1.489(7) . . yes
 O41   H41A     0.960(4) . . no 
 O41   H41B     0.960(3) . . no 
 C11   H11A     0.960(10) . . no 
 C11   H11B     0.960(9) . . no 
 C12   H12A     0.959(7) . . no 
 C12   H12B     0.960(10) . . no 
 C12   H12C     0.960(9) . . no 
 C13   H13      0.960(4) . . no 
 C14   H14      0.960(4) . . no 
 C15   H15      0.961(3) . . no 
 C17   H17      0.961(3) . . no 
 C18   H18      0.960(4) . . no 
 C20   H20      0.960(4) . . no 
 C21   H21      0.960(5) . . no 
 C22   H22      0.961(5) . . no 
 C23   H23      0.960(5) . . no 
 C24   H24      0.960(4) . . no 
 C25   H25      0.960(4) . . no 
 C27   H27      0.960(4) . . no 
 C28   H28      0.960(6) . . no 
 C29   H29      0.960(7) . . no 
 C30   H30      0.961(5) . . no 
 C31   H31      0.961(5) . . no 
 C32   H32      0.960(3) . . no 
 C34   H34      0.960(4) . . no 
 C35   H35      0.959(4) . . no 
 C36   H36      0.961(4) . . no 
 C38   H38A     0.960(5) . . no 
 C38   H38B     0.960(5) . . no 
 C39   H39A     0.960(6) . . no 
 C39   H39B     0.960(6) . . no 
 C39   H39C     0.960(6) . . no 
 

loop_
  _geom_angle_atom_site_label_1 
  _geom_angle_atom_site_label_2 
  _geom_angle_atom_site_label_3 
  _geom_angle 
  _geom_angle_site_symmetry_1
  _geom_angle_site_symmetry_2
  _geom_angle_site_symmetry_3
  _geom_angle_publ_flag 
  O2    V1    O3         107.2(2)  . . . yes
  O2    V1    O4         107.7(1)  . . . yes
  O2    V1    N7         107.8(1)  . . . yes
  O2    V1    N8         105.4(1)  . . . yes
  O3    V1    O4          87.0(1)  . . . yes
  O3    V1    N7          87.3(1)  . . . yes
  O3    V1    N8         147.0(1)  . . . yes
  O4    V1    N7         144.2(1)  . . . yes
  O4    V1    N8          88.2(1)  . . . yes
  N7    V1    N8          77.9(1)  . . . yes
  V1    O3    C9         128.7(2)  . . . yes
  V1    O4    C40        131.1(2)  . . . yes
  C10   O5    C11        121.5(4)  . . . yes
  C37   O6    C38        120.1(3)  . . . yes
  V1    N7    C17        124.7(2)  . . . yes
  V1    N7    C18        117.8(2)  . . . yes
  C17   N7    C18        117.1(3)  . . . yes
  V1    N8    C25        116.4(2)  . . . yes
  V1    N8    C32        126.0(2)  . . . yes
  C25   N8    C32        117.4(3)  . . . yes
  O3    C9    C10        119.1(3)  . . . yes
  O3    C9    C16        123.4(3)  . . . yes
  C10   C9    C16        117.4(3)  . . . yes
  O5    C10   C9         115.3(3)  . . . yes
  O5    C10   C13        123.9(3)  . . . yes
  C9    C10   C13        120.8(3)  . . . yes
  O5    C11   C12        115.2(6)  . . . yes
  C10   C13   C14        120.9(3)  . . . yes
  C13   C14   C15        119.8(3)  . . . yes
  C14   C15   C16        121.1(3)  . . . yes
  C9    C16   C15        120.0(3)  . . . yes
  C9    C16   C17        121.8(3)  . . . yes
  C15   C16   C17        118.1(3)  . . . yes
  N7    C17   C16        126.6(3)  . . . yes
  N7    C18   C19        115.9(3)  . . . yes
  N7    C18   C25        109.8(3)  . . . yes
  C19   C18   C25        112.5(3)  . . . yes
  C18   C19   C20        123.8(3)  . . . yes
  C18   C19   C24        118.3(3)  . . . yes
  C20   C19   C24        117.8(3)  . . . yes
  C19   C20   C21        120.9(4)  . . . yes
  C20   C21   C22        120.5(4)  . . . yes
  C21   C22   C23        119.2(4)  . . . yes
  C22   C23   C24        120.9(4)  . . . yes
  C19   C24   C23        120.7(4)  . . . yes
  N8    C25   C18        106.9(3)  . . . yes
  N8    C25   C26        111.8(3)  . . . yes
  C18   C25   C26        117.3(3)  . . . yes
  C25   C26   C27        124.4(3)  . . . yes
  C25   C26   C31        117.9(4)  . . . yes
  C27   C26   C31        117.7(4)  . . . yes
  C26   C27   C28        121.5(4)  . . . yes
  C27   C28   C29        118.9(5)  . . . yes
  C28   C29   C30        121.0(6)  . . . yes
  C29   C30   C31        120.1(5)  . . . yes
  C26   C31   C30        120.9(5)  . . . yes
  N8    C32   C33        126.7(3)  . . . yes
  C32   C33   C34        118.1(3)  . . . yes
  C32   C33   C40        122.0(3)  . . . yes
  C34   C33   C40        119.8(3)  . . . yes
  C33   C34   C35        120.7(4)  . . . yes
  C34   C35   C36        120.3(4)  . . . yes
  C35   C36   C37        120.8(4)  . . . yes
  O6    C37   C36        125.4(4)  . . . yes
  O6    C37   C40        114.2(3)  . . . yes
  C36   C37   C40        120.4(4)  . . . yes
  O6    C38   C39        107.9(4)  . . . yes
  O4    C40   C33        123.9(3)  . . . yes
  O4    C40   C37        118.1(3)  . . . yes
  C33   C40   C37        118.0(3)  . . . yes
  H41A  O41   H41B       112.9(3)  . . . no 
  O5    C11   H11A       108.6(7)  . . . no 
  O5    C11   H11B       107.5(8)  . . . no 
  C12   C11   H11A       109.3(8)  . . . no 
  C12   C11   H11B       107.0(7)  . . . no 
  H11A  C11   H11B       109.1(7)  . . . no 
  C11   C12   H12A       114.7(6)  . . . no 
  C11   C12   H12B       109.3(8)  . . . no 
  C11   C12   H12C       107.0(7)  . . . no 
  H12A  C12   H12B       108.3(8)  . . . no 
  H12A  C12   H12C       108.3(9)  . . . no 
  H12B  C12   H12C       109.1(7)  . . . no 
  C10   C13   H13        119.7(4)  . . . no 
  C14   C13   H13        119.5(4)  . . . no 
  C13   C14   H14        120.2(4)  . . . no 
  C15   C14   H14        120.0(4)  . . . no 
  C14   C15   H15        119.5(3)  . . . no 
  C16   C15   H15        119.4(3)  . . . no 
  N7    C17   H17        116.6(3)  . . . no 
  C16   C17   H17        116.8(3)  . . . no 
  N7    C18   H18        108.1(3)  . . . no 
  C19   C18   H18        108.0(3)  . . . no 
  C25   C18   H18        101.5(3)  . . . no 
  C19   C20   H20        119.6(4)  . . . no 
  C21   C20   H20        119.5(4)  . . . no 
  C20   C21   H21        119.7(4)  . . . no 
  C22   C21   H21        119.8(4)  . . . no 
  C21   C22   H22        120.3(5)  . . . no 
  C23   C22   H22        120.5(5)  . . . no 
  C22   C23   H23        119.5(4)  . . . no 
  C24   C23   H23        119.6(4)  . . . no 
  C19   C24   H24        119.6(4)  . . . no 
  C23   C24   H24        119.6(4)  . . . no 
  N8    C25   H25        110.5(3)  . . . no 
  C18   C25   H25        110.4(3)  . . . no 
  C26   C25   H25         99.9(3)  . . . no 
  C26   C27   H27        119.2(4)  . . . no 
  C28   C27   H27        119.3(5)  . . . no 
  C27   C28   H28        120.6(5)  . . . no 
  C29   C28   H28        120.5(6)  . . . no 
  C28   C29   H29        119.6(7)  . . . no 
  C30   C29   H29        119.5(6)  . . . no 
  C29   C30   H30        120.0(6)  . . . no 
  C31   C30   H30        120.0(7)  . . . no 
  C26   C31   H31        119.6(4)  . . . no 
  C30   C31   H31        119.5(5)  . . . no 
  N8    C32   H32        116.7(3)  . . . no 
  C33   C32   H32        116.6(3)  . . . no 
  C33   C34   H34        119.7(4)  . . . no 
  C35   C34   H34        119.7(4)  . . . no 
  C34   C35   H35        119.8(4)  . . . no 
  C36   C35   H35        119.9(4)  . . . no 
  C35   C36   H36        119.6(4)  . . . no 
  C37   C36   H36        119.6(4)  . . . no 
  O6    C38   H38A       110.2(4)  . . . no 
  O6    C38   H38B       109.7(5)  . . . no 
  C39   C38   H38A       110.1(5)  . . . no 
  C39   C38   H38B       109.8(5)  . . . no 
  H38A  C38   H38B       109.0(5)  . . . no 
  C38   C39   H39A       107.9(5)  . . . no 
  C38   C39   H39B       110.1(5)  . . . no 
  C38   C39   H39C       109.8(5)  . . . no 
  H39A  C39   H39B       109.9(5)  . . . no 
  H39A  C39   H39C       109.9(6)  . . . no 
  H39B  C39   H39C       109.0(5)  . . . no 

#-------------------------------------------------------------------------
 
 
_publ_contact_author                                                   #ActaC
; Dr. Masanobu Tsuchimoto
  Department of Chemistry
  Faculty of Science and Technology
  Keio University
  Hiyoshi 3-14-1, Kohoku-ku
  Yokohama, 223
  Japan
;
_publ_contact_letter                                                   #ActaC
; Please consider this CIF submission for publication
  in Inorganic Chemistry.
;
 
_publ_contact_author_phone          '(81) 45 563 1141 ext 3913'        #ActaC
_publ_contact_author_fax            '(81) 45 563 5967'                 #ActaC
_publ_contact_author_email                                             #ActaC
; tmoto@chem.keio.ac.jp
;
 
loop_
_publ_author_name                                                      #ActaC
_publ_author_address                                                   #ActaC
 
 'Tsuchimoto, Masanobu'
; Department of Chemistry
  Faculty of Science and Technology
  Keio University
  Hiyoshi 3-14-1, Kohoku-ku
  Yokohama, 223
  Japan
;

_publ_section_title                                                    #ActaC
;
Thermal Dehydrogenation of Oxovanadium(IV) Complexes with Schiff
Base Ligands Derived from meso-1,2-Diphenyl-1,2-ethanediamine in the
Solid State
;


#                                                                             #
#                 [VO(3-EtOsalton)(H2O)].0.5H2O.0.5CH3CN (2)                  #
#                                                                             #
###############################################################################

data_vana
_audit_creation_method            SHELXL 
_chemical_name_systematic 
; 
 ? 
; 
_chemical_name_common             ? 
_chemical_formula_moiety          ? 
_chemical_formula_structural      ? 
_chemical_formula_analytical      ? 
_chemical_formula_sum             'C33 H32.5 N2.5 O6.5 V' 
_chemical_formula_weight          619.07
_chemical_melting_point           ? 
_chemical_compound_source         'Local laboratory'
 
loop_ 
 _atom_type_symbol 
 _atom_type_description 
 _atom_type_scat_dispersion_real 
 _atom_type_scat_dispersion_imag 
 _atom_type_scat_source 
 'C'  'C'    .0033    .0016 
 'International Tables Vol C Tables 4.2.6.8 and 6.1.1.4' 
 'H'  'H'    .0000    .0000 
 'International Tables Vol C Tables 4.2.6.8 and 6.1.1.4' 
 'N'  'N'    .0061    .0033 
 'International Tables Vol C Tables 4.2.6.8 and 6.1.1.4' 
 'O'  'O'    .0106    .0060 
 'International Tables Vol C Tables 4.2.6.8 and 6.1.1.4' 
 'V'  'V'    .3005    .5294 
 'International Tables Vol C Tables 4.2.6.8 and 6.1.1.4' 
 
_symmetry_cell_setting            'Monoclinic' 
_symmetry_space_group_name_H-M    'P21/n' 
 
loop_ 
 _symmetry_equiv_pos_as_xyz 
 'x, y, z' 
 '-x+1/2, y+1/2, -z+1/2' 
 '-x, -y, -z' 
 'x-1/2, -y-1/2, z-1/2' 
 
_cell_length_a                    19.884(1) 
_cell_length_b                    12.084(1) 
_cell_length_c                    26.192(2) 
_cell_angle_alpha                 90.00 
_cell_angle_beta                  96.89(1) 
_cell_angle_gamma                 90.00 
_cell_volume                      6247.9(8) 
_cell_formula_units_Z             8 
_cell_measurement_temperature     293(2) 
_cell_measurement_reflns_used      ? 
_cell_measurement_theta_min        ? 
_cell_measurement_theta_max        ? 
 
_exptl_crystal_description        'plate-like'
_exptl_crystal_colour             'red'
_exptl_crystal_size_max           0.9
_exptl_crystal_size_mid           0.3
_exptl_crystal_size_min           0.01
_exptl_crystal_density_diffrn     1.316 
_exptl_crystal_density_meas        ? 
_exptl_crystal_density_method     'not measured'                        #ActaC
_exptl_crystal_preparation         'grown from acetonitrile solution'
_exptl_crystal_F_000              2584
_exptl_absorpt_coefficient_mu     0.366 
_exptl_absorpt_correction_type    'none'
_exptl_absorpt_correction_T_min   ? 
_exptl_absorpt_correction_T_max   ? 
_exptl_special_details 
; 
 ? 
; 
 
_diffrn_ambient_temperature       293(2) 
_diffrn_radiation_wavelength      0.71073 
_diffrn_radiation_type            MoK\a  
_diffrn_radiation_source          'RU300 Rigaku rotating Mo anode'
_diffrn_radiation_monochromator   graphite 
_diffrn_measurement_device        'RAXIS-IICS' 
_diffrn_measurement_method        'Weissenberg method' 
_diffrn_standards_number          ? 
_diffrn_standards_interval_count  ? 
_diffrn_standards_interval_time   ? 
_diffrn_standards_decay_%         ? 
_diffrn_reflns_number             35532 
_diffrn_reflns_av_R_equivalents   0.1287 
_diffrn_reflns_av_sigmaI/netI     0.1235 
_diffrn_reflns_limit_h_min        -25 
_diffrn_reflns_limit_h_max        21 
_diffrn_reflns_limit_k_min        -14 
_diffrn_reflns_limit_k_max        13 
_diffrn_reflns_limit_l_min        -34 
_diffrn_reflns_limit_l_max        34 
_diffrn_reflns_theta_min          1.22 
_diffrn_reflns_theta_max          28.02 
_reflns_number_total              13569 
_reflns_number_observed           5875 
_reflns_observed_criterion        >2sigma(I) 
 
_computing_data_collection        'CONTROL (Rigaku, 1994)' 
_computing_cell_refinement        'CONTROL (Rigaku, 1994)' 
_computing_data_reduction         'CONTROL (Rigaku, 1994)' 
_computing_structure_solution     'SHELXS-86 (Sheldrick, 1990)' 
_computing_structure_refinement   'SHELXL-93 (Sheldrick, 1993)' 
_computing_molecular_graphics     'ORTEP-II (Johnson, 1976)'
_computing_publication_material   'SHELXL-93 (Sheldrick, 1993)' 
 
_refine_special_details 
; 
 Refinement on F^2^ for ALL reflections except for 2570 with very negative F^2^ 
 or flagged by the user for potential systematic errors.  Weighted R-factors 
 wR and all goodnesses of fit S are based on F^2^, conventional R-factors R 
 are based on F, with F set to zero for negative F^2^. The observed criterion 
 of F^2^ > 2sigma(F^2^) is used only for calculating -R-factor-obs etc. and is 
 not relevant to the choice of reflections for refinement.  R-factors based 
 on F^2^ are statistically about twice as large as those based on F, and R- 
 factors based on ALL data will be even larger. 
; 
 
_refine_ls_structure_factor_coef  Fsqd  
_refine_ls_matrix_type            full 
_refine_ls_weighting_scheme 
 'calc w=1/[s^2^(Fo^2^)+( 0.0951P)^2^+0.0000P] where P=(Fo^2^+2Fc^2^)/3' 
_atom_sites_solution_primary      direct 
_atom_sites_solution_secondary    difmap 
_atom_sites_solution_hydrogens    geom 
_refine_ls_hydrogen_treatment     riding 
_refine_ls_extinction_method      none 
_refine_ls_extinction_coef        ? 
_refine_ls_number_reflns          10999 
_refine_ls_number_parameters      776 
_refine_ls_number_restraints      0 
_refine_ls_R_factor_all           0.1806 
_refine_ls_R_factor_obs           0.0702 
_refine_ls_wR_factor_all          0.2223 
_refine_ls_wR_factor_obs          0.1556 
_refine_ls_goodness_of_fit_all    0.950 
_refine_ls_goodness_of_fit_obs    1.134 
_refine_ls_restrained_S_all       1.038 
_refine_ls_restrained_S_obs       1.134 
_refine_ls_shift/esd_max          -0.007 
_refine_ls_shift/esd_mean         0.001 
 
loop_ 
 _atom_site_label 
 _atom_site_type_symbol 
 _atom_site_fract_x 
 _atom_site_fract_y 
 _atom_site_fract_z 
 _atom_site_U_iso_or_equiv 
 _atom_site_thermal_displace_type 
 _atom_site_occupancy 
 _atom_site_calc_flag 
 _atom_site_refinement_flags 
 _atom_site_disorder_group 
V1 V -0.05936(4) 0.63688(5) 0.22924(3) 0.0395(2) Uani 1 d . . 
V2 V 0.05761(4) 0.25484(5) 0.26486(3) 0.0387(2) Uani 1 d . . 
O3 O -0.1011(2) 0.7273(2) 0.25586(11) 0.0547(8) Uani 1 d . . 
O4 O -0.10804(15) 0.5001(2) 0.24166(10) 0.0471(7) Uani 1 d . . 
O5 O 0.01531(15) 0.6063(2) 0.28254(10) 0.0434(7) Uani 1 d . . 
O6 O -0.1704(2) 0.3521(2) 0.28940(12) 0.0554(8) Uani 1 d . . 
O7 O 0.0790(2) 0.5648(3) 0.37149(11) 0.0617(9) Uani 1 d . . 
O8 O 0.0988(2) 0.1663(2) 0.23554(11) 0.0565(8) Uani 1 d . . 
O9 O 0.10460(14) 0.3920(2) 0.25071(10) 0.0442(7) Uani 1 d . . 
O10 O -0.01995(15) 0.2822(2) 0.21351(10) 0.0444(7) Uani 1 d . . 
O11 O 0.1633(2) 0.5389(2) 0.20015(11) 0.0545(8) Uani 1 d . . 
O12 O -0.0855(2) 0.3144(3) 0.12413(12) 0.0694(10) Uani 1 d . . 
N13 N -0.1110(2) 0.6453(3) 0.15647(12) 0.0432(8) Uani 1 d . . 
N14 N 0.0017(2) 0.7431(2) 0.19407(12) 0.0383(8) Uani 1 d . . 
N15 N 0.1144(2) 0.2460(3) 0.33628(12) 0.0402(8) Uani 1 d . . 
N16 N 0.0004(2) 0.1465(2) 0.30204(12) 0.0390(8) Uani 1 d . . 
N86 N -0.1703(4) 0.5968(6) 0.4453(2) 0.133(3) Uani 1 d . . 
C17 C -0.1669(2) 0.4666(3) 0.2179(2) 0.0410(10) Uani 1 d . . 
C18 C -0.2018(2) 0.3829(3) 0.2425(2) 0.0468(10) Uani 1 d . . 
C19 C -0.2046(3) 0.2748(4) 0.3188(2) 0.069(2) Uani 1 d . . 
H19A H -0.2089(3) 0.2038(4) 0.3013(2) 0.083 Uiso 1 calc R . 
H19B H -0.2496(3) 0.3016(4) 0.3228(2) 0.083 Uiso 1 calc R . 
C20 C -0.1635(4) 0.2625(5) 0.3703(2) 0.089(2) Uani 1 d . . 
H20A H -0.1854(4) 0.2110(5) 0.3908(2) 0.134 Uiso 1 calc R . 
H20B H -0.1597(4) 0.3331(5) 0.3873(2) 0.134 Uiso 1 calc R . 
H20C H -0.1191(4) 0.2357(5) 0.3658(2) 0.134 Uiso 1 calc R . 
C21 C -0.2616(3) 0.3424(4) 0.2200(2) 0.0571(12) Uani 1 d . . 
H21 H -0.2836(3) 0.2875(4) 0.2365(2) 0.069 Uiso 1 calc R . 
C22 C -0.2906(3) 0.3819(4) 0.1725(2) 0.0651(14) Uani 1 d . . 
H22 H -0.3318(3) 0.3538(4) 0.1574(2) 0.078 Uiso 1 calc R . 
C23 C -0.2583(2) 0.4619(4) 0.1483(2) 0.0547(12) Uani 1 d . . 
H23 H -0.2779(2) 0.4882(4) 0.1166(2) 0.066 Uiso 1 calc R . 
C24 C -0.1963(2) 0.5053(3) 0.1699(2) 0.0446(10) Uani 1 d . . 
C25 C -0.1662(2) 0.5895(3) 0.1412(2) 0.0469(10) Uani 1 d . . 
H25 H -0.1880(2) 0.6059(3) 0.1087(2) 0.056 Uiso 1 calc R . 
C26 C -0.0866(2) 0.7286(3) 0.1259(2) 0.0457(10) Uani 1 d . . 
C27 C -0.1248(2) 0.7625(4) 0.0762(2) 0.0525(12) Uani 1 d . . 
C28 C -0.1654(3) 0.8540(5) 0.0734(2) 0.082(2) Uani 1 d . . 
H28 H -0.1691(3) 0.8938(5) 0.1034(2) 0.099 Uiso 1 calc R . 
C29 C -0.2004(4) 0.8891(8) 0.0288(3) 0.119(3) Uani 1 d . . 
H29 H -0.2271(4) 0.9524(8) 0.0285(3) 0.143 Uiso 1 calc R . 
C30 C -0.1967(4) 0.8325(9) -0.0149(4) 0.130(4) Uani 1 d . . 
H30 H -0.2212(4) 0.8570(9) -0.0453(4) 0.156 Uiso 1 calc R . 
C31 C -0.1573(5) 0.7391(7) -0.0158(2) 0.116(3) Uani 1 d . . 
H31 H -0.1545(5) 0.7011(7) -0.0464(2) 0.139 Uiso 1 calc R . 
C32 C -0.1206(3) 0.7017(5) 0.0319(2) 0.080(2) Uani 1 d . . 
H32 H -0.0945(3) 0.6377(5) 0.0328(2) 0.096 Uiso 1 calc R . 
C33 C -0.0285(2) 0.7796(3) 0.14529(15) 0.0435(10) Uani 1 d . . 
C34 C 0.0024(2) 0.8727(3) 0.1188(2) 0.0471(10) Uani 1 d . . 
C35 C -0.0006(3) 0.9783(4) 0.1387(2) 0.0632(13) Uani 1 d . . 
H35 H -0.0205(3) 0.9895(4) 0.1686(2) 0.076 Uiso 1 calc R . 
C36 C 0.0256(3) 1.0675(4) 0.1146(2) 0.079(2) Uani 1 d . . 
H36 H 0.0231(3) 1.1381(4) 0.1283(2) 0.095 Uiso 1 calc R . 
C37 C 0.0545(4) 1.0524(5) 0.0717(2) 0.087(2) Uani 1 d . . 
H37 H 0.0715(4) 1.1130(5) 0.0554(2) 0.104 Uiso 1 calc R . 
C38 C 0.0595(3) 0.9485(6) 0.0513(2) 0.089(2) Uani 1 d . . 
H38 H 0.0804(3) 0.9389(6) 0.0217(2) 0.107 Uiso 1 calc R . 
C39 C 0.0330(3) 0.8561(4) 0.0751(2) 0.0679(14) Uani 1 d . . 
H39 H 0.0362(3) 0.7855(4) 0.0615(2) 0.081 Uiso 1 calc R . 
C40 C 0.0606(2) 0.7797(3) 0.2148(2) 0.0448(10) Uani 1 d . . 
H40 H 0.0823(2) 0.8309(3) 0.1959(2) 0.054 Uiso 1 calc R . 
C41 C 0.0947(2) 0.7479(3) 0.2639(2) 0.0442(10) Uani 1 d . . 
C42 C 0.1566(3) 0.8015(4) 0.2810(2) 0.0553(12) Uani 1 d . . 
H42 H 0.1738(3) 0.8531(4) 0.2596(2) 0.066 Uiso 1 calc R . 
C43 C 0.1914(3) 0.7799(4) 0.3274(2) 0.0627(13) Uani 1 d . . 
H43 H 0.2315(3) 0.8175(4) 0.3380(2) 0.075 Uiso 1 calc R . 
C44 C 0.1669(3) 0.7007(4) 0.3593(2) 0.0591(12) Uani 1 d . . 
H44 H 0.1907(3) 0.6854(4) 0.3913(2) 0.071 Uiso 1 calc R . 
C45 C 0.1081(2) 0.6456(4) 0.3435(2) 0.0497(11) Uani 1 d . . 
C46 C 0.1071(3) 0.5439(5) 0.4234(2) 0.080(2) Uani 1 d . . 
H46A H 0.1136(3) 0.6128(5) 0.4424(2) 0.096 Uiso 1 calc R . 
H46B H 0.1506(3) 0.5070(5) 0.4243(2) 0.096 Uiso 1 calc R . 
C47 C 0.0588(5) 0.4731(8) 0.4460(3) 0.151(4) Uani 1 d . . 
H47A H 0.0757(5) 0.4570(8) 0.4811(3) 0.227 Uiso 1 calc R . 
H47B H 0.0529(5) 0.4054(8) 0.4269(3) 0.227 Uiso 1 calc R . 
H47C H 0.0161(5) 0.5106(8) 0.4448(3) 0.227 Uiso 1 calc R . 
C48 C 0.0695(2) 0.6656(3) 0.29511(15) 0.0418(10) Uani 1 d . . 
C49 C 0.1633(2) 0.4263(3) 0.2723(2) 0.0403(9) Uani 1 d . . 
C50 C 0.1974(2) 0.5093(3) 0.2464(2) 0.0435(10) Uani 1 d . . 
C51 C 0.1965(3) 0.6114(4) 0.1684(2) 0.069(2) Uani 1 d . . 
H51A H 0.2409(3) 0.5826(4) 0.1638(2) 0.083 Uiso 1 calc R . 
H51B H 0.2021(3) 0.6839(4) 0.1842(2) 0.083 Uiso 1 calc R . 
C52 C 0.1537(3) 0.6190(5) 0.1183(2) 0.089(2) Uani 1 d . . 
H52A H 0.1748(3) 0.6675(5) 0.0959(2) 0.133 Uiso 1 calc R . 
H52B H 0.1100(3) 0.6477(5) 0.1234(2) 0.133 Uiso 1 calc R . 
H52C H 0.1486(3) 0.5468(5) 0.1031(2) 0.133 Uiso 1 calc R . 
C53 C 0.2585(2) 0.5520(4) 0.2678(2) 0.0555(12) Uani 1 d . . 
H53 H 0.2793(2) 0.6070(4) 0.2505(2) 0.067 Uiso 1 calc R . 
C54 C 0.2892(3) 0.5146(4) 0.3147(2) 0.0586(12) Uani 1 d . . 
H54 H 0.3304(3) 0.5445(4) 0.3288(2) 0.070 Uiso 1 calc R . 
C55 C 0.2595(2) 0.4345(4) 0.3399(2) 0.0532(11) Uani 1 d . . 
H55 H 0.2808(2) 0.4098(4) 0.3714(2) 0.064 Uiso 1 calc R . 
C56 C 0.1968(2) 0.3871(3) 0.3201(2) 0.0428(10) Uani 1 d . . 
C57 C 0.1696(2) 0.3018(3) 0.3491(2) 0.0453(10) Uani 1 d . . 
H57 H 0.1941(2) 0.2842(3) 0.3805(2) 0.054 Uiso 1 calc R . 
C58 C 0.0929(2) 0.1605(3) 0.36756(14) 0.0412(10) Uani 1 d . . 
C59 C 0.1383(2) 0.1202(4) 0.4132(2) 0.0461(10) Uani 1 d . . 
C60 C 0.1553(3) 0.1848(4) 0.4567(2) 0.0566(12) Uani 1 d . . 
H60 H 0.1367(3) 0.2550(4) 0.4588(2) 0.068 Uiso 1 calc R . 
C61 C 0.2002(3) 0.1440(5) 0.4968(2) 0.077(2) Uani 1 d . . 
H61 H 0.2121(3) 0.1872(5) 0.5258(2) 0.092 Uiso 1 calc R . 
C62 C 0.2273(3) 0.0395(5) 0.4937(2) 0.078(2) Uani 1 d . . 
H62 H 0.2581(3) 0.0131(5) 0.5204(2) 0.093 Uiso 1 calc R . 
C63 C 0.2094(3) -0.0244(5) 0.4524(2) 0.077(2) Uani 1 d . . 
H63 H 0.2269(3) -0.0956(5) 0.4511(2) 0.093 Uiso 1 calc R . 
C64 C 0.1655(3) 0.0150(4) 0.4121(2) 0.0616(13) Uani 1 d . . 
H64 H 0.1538(3) -0.0298(4) 0.3835(2) 0.074 Uiso 1 calc R . 
C65 C 0.0332(2) 0.1103(3) 0.3500(2) 0.0441(10) Uani 1 d . . 
C66 C 0.0037(2) 0.0190(3) 0.3780(2) 0.0464(10) Uani 1 d . . 
C67 C -0.0278(3) 0.0414(4) 0.4214(2) 0.0589(13) Uani 1 d . . 
H67 H -0.0312(3) 0.1139(4) 0.4328(2) 0.071 Uiso 1 calc R . 
C68 C -0.0542(3) -0.0451(5) 0.4475(2) 0.075(2) Uani 1 d . . 
H68 H -0.0763(3) -0.0300(5) 0.4761(2) 0.090 Uiso 1 calc R . 
C69 C -0.0483(3) -0.1505(5) 0.4321(2) 0.079(2) Uani 1 d . . 
H69 H -0.0649(3) -0.2075(5) 0.4509(2) 0.095 Uiso 1 calc R . 
C70 C -0.0182(3) -0.1749(4) 0.3891(2) 0.079(2) Uani 1 d . . 
H70 H -0.0154(3) -0.2476(4) 0.3779(2) 0.095 Uiso 1 calc R . 
C71 C 0.0080(3) -0.0886(4) 0.3624(2) 0.0666(14) Uani 1 d . . 
H71 H 0.0290(3) -0.1044(4) 0.3334(2) 0.080 Uiso 1 calc R . 
C72 C -0.0578(2) 0.1061(3) 0.2824(2) 0.0482(11) Uani 1 d . . 
H72 H -0.0778(2) 0.0542(3) 0.3020(2) 0.058 Uiso 1 calc R . 
C73 C -0.0935(2) 0.1340(4) 0.2340(2) 0.0494(11) Uani 1 d . . 
C74 C -0.1529(3) 0.0730(4) 0.2167(2) 0.0619(13) Uani 1 d . . 
H74 H -0.1678(3) 0.0194(4) 0.2383(2) 0.074 Uiso 1 calc R . 
C75 C -0.1881(3) 0.0898(4) 0.1706(2) 0.072(2) Uani 1 d . . 
H75 H -0.2264(3) 0.0476(4) 0.1603(2) 0.086 Uiso 1 calc R . 
C76 C -0.1673(3) 0.1699(4) 0.1385(2) 0.0687(14) Uani 1 d . . 
H76 H -0.1918(3) 0.1816(4) 0.1064(2) 0.082 Uiso 1 calc R . 
C77 C -0.1115(3) 0.2319(4) 0.1532(2) 0.0538(12) Uani 1 d . . 
C78 C -0.1085(4) 0.3205(6) 0.0710(2) 0.111(3) Uani 1 d . . 
H78A H -0.1530(4) 0.3543(6) 0.0655(2) 0.134 Uiso 1 calc R . 
H78B H -0.1113(4) 0.2470(6) 0.0559(2) 0.134 Uiso 1 calc R . 
C79 C -0.0577(5) 0.3900(7) 0.0468(3) 0.149(4) Uani 1 d . . 
H79A H -0.0714(5) 0.3962(7) 0.0105(3) 0.224 Uiso 1 calc R . 
H79B H -0.0139(5) 0.3556(7) 0.0526(3) 0.224 Uiso 1 calc R . 
H79C H -0.0554(5) 0.4624(7) 0.0620(3) 0.224 Uiso 1 calc R . 
C80 C -0.0727(2) 0.2183(3) 0.2013(2) 0.0450(10) Uani 1 d . . 
O81 O 0.0032(2) 0.5086(2) 0.18287(10) 0.0499(7) Uani 1 d . . 
O82 O -0.00593(15) 0.3795(2) 0.31112(10) 0.0469(7) Uani 1 d . . 
O83 O 0.1275(3) 0.3184(4) 0.1388(2) 0.134(2) Uani 1 d . . 
C84 C -0.1476(4) 0.5873(5) 0.4081(3) 0.085(2) Uani 1 d . . 
C85 C -0.1187(4) 0.5755(5) 0.3599(2) 0.099(2) Uani 1 d . . 
H85A H -0.1473(13) 0.5287(33) 0.3370(7) 0.148 Uiso 1 calc R . 
H85B H -0.0744(10) 0.5431(37) 0.3665(3) 0.148 Uiso 1 calc R . 
H85C H -0.1153(24) 0.6470(7) 0.3444(10) 0.148 Uiso 1 calc R . 
 
loop_ 
 _atom_site_aniso_label 
 _atom_site_aniso_U_11 
 _atom_site_aniso_U_22 
 _atom_site_aniso_U_33 
 _atom_site_aniso_U_23 
 _atom_site_aniso_U_13 
 _atom_site_aniso_U_12 
V1 0.0278(4) 0.0432(4) 0.0475(4) 0.0039(3) 0.0045(3) -0.0029(3) 
V2 0.0270(4) 0.0429(4) 0.0461(4) 0.0019(3) 0.0045(3) -0.0010(3) 
O3 0.044(2) 0.054(2) 0.068(2) -0.0016(14) 0.013(2) 0.0072(14) 
O4 0.031(2) 0.052(2) 0.058(2) 0.0086(13) 0.0035(14) -0.0056(13) 
O5 0.036(2) 0.042(2) 0.051(2) 0.0042(12) -0.0003(13) -0.0055(12) 
O6 0.047(2) 0.052(2) 0.069(2) 0.0134(15) 0.015(2) -0.0109(15) 
O7 0.062(2) 0.067(2) 0.053(2) 0.0094(15) -0.004(2) -0.006(2) 
O8 0.045(2) 0.057(2) 0.068(2) -0.0055(14) 0.011(2) 0.0084(15) 
O9 0.026(2) 0.052(2) 0.053(2) 0.0105(12) 0.0000(13) -0.0063(13) 
O10 0.036(2) 0.045(2) 0.051(2) 0.0040(12) 0.0000(13) -0.0030(13) 
O11 0.046(2) 0.061(2) 0.058(2) 0.0149(14) 0.013(2) -0.0110(15) 
O12 0.067(3) 0.082(2) 0.055(2) 0.009(2) -0.010(2) -0.008(2) 
N13 0.037(2) 0.042(2) 0.050(2) 0.0059(15) 0.002(2) -0.002(2) 
N14 0.031(2) 0.038(2) 0.045(2) 0.0036(14) 0.003(2) 0.0010(15) 
N15 0.029(2) 0.042(2) 0.049(2) 0.0028(14) 0.003(2) -0.0001(15) 
N16 0.033(2) 0.036(2) 0.048(2) -0.0002(14) 0.003(2) -0.0042(14) 
N86 0.147(7) 0.161(6) 0.096(4) -0.016(4) 0.035(5) 0.005(5) 
C17 0.025(2) 0.041(2) 0.058(3) -0.004(2) 0.010(2) -0.007(2) 
C18 0.037(3) 0.048(3) 0.057(3) -0.003(2) 0.012(2) -0.001(2) 
C19 0.062(4) 0.058(3) 0.093(4) 0.006(3) 0.032(3) -0.013(3) 
C20 0.098(6) 0.085(4) 0.086(4) 0.029(3) 0.018(4) -0.011(4) 
C21 0.042(3) 0.052(3) 0.078(3) 0.001(2) 0.008(3) -0.011(2) 
C22 0.039(3) 0.067(3) 0.089(4) -0.013(3) 0.006(3) -0.015(2) 
C23 0.038(3) 0.058(3) 0.066(3) -0.001(2) -0.002(2) -0.012(2) 
C24 0.030(2) 0.045(2) 0.058(3) -0.003(2) 0.004(2) -0.003(2) 
C25 0.037(3) 0.050(3) 0.052(3) 0.000(2) -0.002(2) 0.000(2) 
C26 0.046(3) 0.044(2) 0.047(2) 0.003(2) 0.004(2) -0.001(2) 
C27 0.038(3) 0.063(3) 0.054(3) 0.013(2) -0.001(2) -0.010(2) 
C28 0.062(4) 0.095(4) 0.089(4) 0.029(3) 0.007(3) 0.017(3) 
C29 0.077(6) 0.167(8) 0.111(6) 0.064(6) 0.003(5) 0.029(5) 
C30 0.072(6) 0.191(10) 0.117(7) 0.074(7) -0.034(5) -0.037(6) 
C31 0.128(8) 0.160(7) 0.055(4) 0.008(4) -0.003(4) -0.100(6) 
C32 0.096(5) 0.084(4) 0.057(3) 0.001(3) 0.001(3) -0.028(3) 
C33 0.041(3) 0.043(2) 0.046(2) 0.004(2) 0.004(2) -0.004(2) 
C34 0.042(3) 0.049(3) 0.049(2) 0.007(2) 0.002(2) -0.005(2) 
C35 0.060(4) 0.053(3) 0.078(3) 0.008(2) 0.016(3) -0.006(2) 
C36 0.076(5) 0.056(3) 0.104(4) 0.012(3) 0.010(4) -0.011(3) 
C37 0.086(5) 0.080(4) 0.094(4) 0.026(3) 0.012(4) -0.022(3) 
C38 0.079(5) 0.127(6) 0.066(4) 0.024(4) 0.029(3) -0.014(4) 
C39 0.073(4) 0.074(3) 0.060(3) 0.008(2) 0.021(3) -0.006(3) 
C40 0.039(3) 0.044(2) 0.052(3) 0.002(2) 0.008(2) -0.009(2) 
C41 0.032(3) 0.046(3) 0.054(3) -0.003(2) 0.003(2) -0.009(2) 
C42 0.046(3) 0.058(3) 0.061(3) -0.001(2) 0.004(2) -0.013(2) 
C43 0.038(3) 0.070(3) 0.077(3) -0.015(3) -0.007(3) -0.014(2) 
C44 0.044(3) 0.072(3) 0.059(3) -0.006(2) -0.007(2) 0.003(2) 
C45 0.044(3) 0.051(3) 0.052(3) 0.002(2) 0.001(2) 0.000(2) 
C46 0.086(5) 0.097(4) 0.054(3) 0.017(3) -0.004(3) 0.012(3) 
C47 0.143(9) 0.213(9) 0.099(5) 0.064(6) 0.021(5) 0.018(7) 
C48 0.032(3) 0.047(2) 0.047(2) -0.007(2) 0.004(2) 0.002(2) 
C49 0.027(2) 0.041(2) 0.054(2) -0.002(2) 0.007(2) 0.002(2) 
C50 0.032(3) 0.044(2) 0.056(3) 0.002(2) 0.015(2) 0.000(2) 
C51 0.071(4) 0.065(3) 0.078(4) 0.012(2) 0.030(3) -0.009(3) 
C52 0.085(5) 0.110(5) 0.074(4) 0.037(3) 0.021(3) -0.002(4) 
C53 0.035(3) 0.056(3) 0.076(3) 0.004(2) 0.012(2) -0.007(2) 
C54 0.041(3) 0.055(3) 0.080(3) 0.001(2) 0.007(3) -0.012(2) 
C55 0.033(3) 0.059(3) 0.066(3) 0.001(2) 0.000(2) -0.004(2) 
C56 0.031(3) 0.041(2) 0.056(3) -0.002(2) 0.006(2) -0.003(2) 
C57 0.036(3) 0.047(3) 0.053(3) -0.001(2) 0.004(2) 0.000(2) 
C58 0.042(3) 0.037(2) 0.045(2) 0.002(2) 0.007(2) 0.000(2) 
C59 0.033(3) 0.057(3) 0.048(2) 0.009(2) 0.003(2) 0.000(2) 
C60 0.050(3) 0.071(3) 0.048(3) 0.003(2) 0.004(2) 0.001(2) 
C61 0.073(4) 0.106(5) 0.050(3) 0.000(3) 0.001(3) -0.017(4) 
C62 0.063(4) 0.099(4) 0.067(4) 0.028(3) -0.013(3) 0.008(3) 
C63 0.068(4) 0.070(4) 0.091(4) 0.019(3) 0.000(3) 0.022(3) 
C64 0.050(3) 0.059(3) 0.075(3) 0.004(2) 0.002(3) 0.007(2) 
C65 0.040(3) 0.043(2) 0.051(2) 0.001(2) 0.008(2) -0.003(2) 
C66 0.039(3) 0.042(2) 0.057(3) 0.007(2) 0.003(2) -0.004(2) 
C67 0.062(4) 0.059(3) 0.057(3) 0.003(2) 0.012(3) -0.010(2) 
C68 0.080(4) 0.088(4) 0.057(3) 0.007(3) 0.015(3) -0.025(3) 
C69 0.064(4) 0.084(4) 0.089(4) 0.033(3) 0.010(3) -0.023(3) 
C70 0.069(4) 0.044(3) 0.127(5) 0.012(3) 0.025(4) -0.011(3) 
C71 0.057(4) 0.053(3) 0.094(4) -0.001(2) 0.028(3) -0.004(2) 
C72 0.035(3) 0.052(3) 0.057(3) 0.002(2) 0.003(2) -0.007(2) 
C73 0.036(3) 0.055(3) 0.057(3) -0.001(2) 0.005(2) -0.001(2) 
C74 0.041(3) 0.069(3) 0.074(3) -0.002(2) -0.001(3) -0.019(2) 
C75 0.052(4) 0.083(4) 0.076(4) -0.006(3) -0.011(3) -0.028(3) 
C76 0.057(4) 0.078(4) 0.065(3) -0.009(3) -0.016(3) -0.005(3) 
C77 0.044(3) 0.063(3) 0.052(3) -0.005(2) -0.004(2) 0.001(2) 
C78 0.122(7) 0.131(6) 0.074(4) 0.029(4) -0.019(4) -0.010(5) 
C79 0.195(11) 0.163(8) 0.093(5) 0.045(5) 0.033(6) 0.001(7) 
C80 0.031(3) 0.047(2) 0.058(3) -0.006(2) 0.006(2) 0.001(2) 
O81 0.044(2) 0.047(2) 0.059(2) 0.0041(12) 0.0069(15) 0.0007(13) 
O82 0.038(2) 0.046(2) 0.057(2) 0.0009(12) 0.0090(14) 0.0027(13) 
O83 0.169(6) 0.134(4) 0.105(3) -0.017(3) 0.049(4) -0.017(4) 
C84 0.081(5) 0.085(4) 0.090(5) -0.005(3) 0.009(4) -0.003(3) 
C85 0.104(6) 0.106(5) 0.093(4) -0.023(3) 0.041(4) -0.027(4) 
 
_geom_special_details 
; 
 All esds (except the esd in the dihedral angle between two l.s. planes) 
 are estimated using the full covariance matrix.  The cell esds are taken 
 into account individually in the estimation of esds in distances, angles 
 and torsion angles; correlations between esds in cell parameters are only 
 used when they are defined by crystal symmetry.  An approximate (isotropic) 
 treatment of cell esds is used for estimating esds involving l.s. planes. 
; 
 
loop_ 
 _geom_bond_atom_site_label_1 
 _geom_bond_atom_site_label_2 
 _geom_bond_distance 
 _geom_bond_site_symmetry_2 
 _geom_bond_publ_flag 
V1 O3 1.584(3) . ? 
V1 O5 1.948(3) . yes
V1 O4 1.962(3) . yes
V1 N13 2.056(3) . yes
V1 N14 2.059(3) . yes
V1 O81 2.406(3) . yes
V2 O8 1.599(3) . yes
V2 O10 1.949(3) . yes
V2 O9 1.959(3) . yes
V2 N16 2.055(3) . yes
V2 N15 2.069(3) . yes
V2 O82 2.388(3) . yes
O4 C17 1.321(5) . yes
O5 C48 1.302(5) . yes
O6 C18 1.361(5) . yes
O6 C19 1.432(5) . yes
O7 C45 1.389(5) . yes
O7 C46 1.430(6) . yes
O9 C49 1.303(5) . yes
O10 C80 1.311(5) . yes
O11 C50 1.362(5) . yes
O11 C51 1.423(5) . yes
O12 C77 1.390(6) . yes
O12 C78 1.414(6) . yes
N13 C25 1.309(5) . yes
N13 C26 1.408(5) . yes
N14 C40 1.307(5) . yes
N14 C33 1.415(5) . yes
N15 C57 1.297(5) . yes
N15 C58 1.417(5) . yes
N16 C72 1.302(5) . yes
N16 C65 1.413(5) . yes
N86 C84 1.127(7) . yes
C17 C24 1.401(6) . yes
C17 C18 1.425(5) . yes
C18 C21 1.354(6) . yes
C19 C20 1.499(8) . yes
C21 C22 1.391(7) . yes
C22 C23 1.359(6) . yes
C23 C24 1.395(6) . yes
C24 C25 1.439(6) . yes
C26 C33 1.353(6) . yes
C26 C27 1.484(6) . yes
C27 C28 1.366(7) . yes
C27 C32 1.384(7) . yes
C28 C29 1.355(9) . yes
C29 C30 1.344(11) . yes
C30 C31 1.375(12) . yes
C31 C32 1.442(9) . yes
C33 C34 1.493(5) . yes
C34 C39 1.373(6) . yes
C34 C35 1.382(6) . yes
C35 C36 1.381(7) . yes
C36 C37 1.335(8) . yes
C37 C38 1.373(8) . yes
C38 C39 1.410(7) . yes
C40 C41 1.432(6) . yes
C41 C48 1.417(5) . yes
C41 C42 1.415(6) . yes
C42 C43 1.351(6) . yes
C43 C44 1.396(7) . yes
C44 C45 1.367(6) . yes
C45 C48 1.420(6) . yes
C46 C47 1.463(10) . yes
C49 C50 1.427(5) . yes
C49 C56 1.427(6) . yes
C50 C53 1.376(6) . yes
C51 C52 1.479(8) . yes
C53 C54 1.379(6) . yes
C54 C55 1.349(6) . yes
C55 C56 1.412(6) . yes
C56 C57 1.424(6) . yes
C58 C65 1.362(6) . yes
C58 C59 1.490(6) . yes
C59 C64 1.383(6) . yes
C59 C60 1.388(6) . yes
C60 C61 1.385(7) . yes
C61 C62 1.379(8) . yes
C62 C63 1.340(7) . yes
C63 C64 1.374(7) . yes
C65 C66 1.485(5) . yes
C66 C71 1.369(6) . yes
C66 C67 1.388(6) . yes
C67 C68 1.386(6) . yes
C68 C69 1.346(7) . yes
C69 C70 1.370(7) . yes
C70 C71 1.391(6) . yes
C72 C73 1.419(6) . yes
C73 C74 1.419(6) . yes
C73 C80 1.422(6) . yes
C74 C75 1.337(7) . yes
C75 C76 1.379(7) . yes
C76 C77 1.356(7) . yes
C77 C80 1.407(6) . yes
C78 C79 1.510(10) . yes
C84 C85 1.455(8) . yes
 
loop_ 
 _geom_angle_atom_site_label_1 
 _geom_angle_atom_site_label_2 
 _geom_angle_atom_site_label_3 
 _geom_angle 
 _geom_angle_site_symmetry_1 
 _geom_angle_site_symmetry_3 
 _geom_angle_publ_flag 
O3 V1 O5 102.13(14) . . yes
O3 V1 O4 102.30(14) . . yes
O5 V1 O4 94.03(11) . . yes
O3 V1 N13 98.3(2) . . yes
O5 V1 N13 157.95(13) . . yes
O4 V1 N13 89.66(12) . . yes
O3 V1 N14 97.77(14) . . yes
O5 V1 N14 89.95(12) . . yes
O4 V1 N14 158.20(12) . . yes
N13 V1 N14 79.04(13) . . yes
O3 V1 O81 175.48(13) . . yes
O5 V1 O81 81.00(11) . . yes
O4 V1 O81 80.59(11) . . yes
N13 V1 O81 78.18(12) . . yes
N14 V1 O81 78.88(11) . . yes
O8 V2 O10 100.98(14) . . yes
O8 V2 O9 101.08(14) . . yes
O10 V2 O9 94.69(11) . . yes
O8 V2 N16 98.37(14) . . yes
O10 V2 N16 89.86(13) . . yes
O9 V2 N16 158.77(12) . . yes
O8 V2 N15 98.30(15) . . yes
O10 V2 N15 159.02(13) . . yes
O9 V2 N15 89.63(12) . . yes
N16 V2 N15 79.18(13) . . yes
O8 V2 O82 177.06(13) . . yes
O10 V2 O82 79.64(11) . . yes
O9 V2 O82 81.71(11) . . yes
N16 V2 O82 78.74(11) . . yes
N15 V2 O82 80.69(11) . . yes
C17 O4 V1 127.3(3) . . yes
C48 O5 V1 127.8(3) . . yes
C18 O6 C19 117.8(4) . . yes
C45 O7 C46 119.2(4) . . yes
C49 O9 V2 127.6(3) . . yes
C80 O10 V2 127.7(3) . . yes
C50 O11 C51 117.6(4) . . yes
C77 O12 C78 118.6(4) . . yes
C25 N13 C26 121.9(4) . . yes
C25 N13 V1 124.4(3) . . yes
C26 N13 V1 113.2(3) . . yes
C40 N14 C33 122.1(3) . . yes
C40 N14 V1 124.9(3) . . yes
C33 N14 V1 112.9(3) . . yes
C57 N15 C58 122.3(4) . . yes
C57 N15 V2 124.0(3) . . yes
C58 N15 V2 113.0(3) . . yes
C72 N16 C65 121.9(3) . . yes
C72 N16 V2 124.6(3) . . yes
C65 N16 V2 113.2(3) . . yes
O4 C17 C24 124.9(4) . . yes
O4 C17 C18 117.2(4) . . yes
C24 C17 C18 118.0(4) . . yes
C21 C18 O6 125.3(4) . . yes
C21 C18 C17 120.7(4) . . yes
O6 C18 C17 114.0(4) . . yes
O6 C19 C20 107.8(4) . . yes
C18 C21 C22 120.9(4) . . yes
C23 C22 C21 119.5(5) . . yes
C22 C23 C24 121.5(5) . . yes
C23 C24 C17 119.5(4) . . yes
C23 C24 C25 117.2(4) . . yes
C17 C24 C25 123.3(4) . . yes
N13 C25 C24 126.2(4) . . yes
C33 C26 N13 116.7(4) . . yes
C33 C26 C27 121.8(4) . . yes
N13 C26 C27 121.4(4) . . yes
C28 C27 C32 118.7(5) . . yes
C28 C27 C26 120.4(5) . . yes
C32 C27 C26 120.9(5) . . yes
C29 C28 C27 122.5(7) . . yes
C30 C29 C28 120.1(8) . . yes
C29 C30 C31 121.4(8) . . yes
C30 C31 C32 118.2(7) . . yes
C27 C32 C31 119.0(7) . . yes
C26 C33 N14 116.6(4) . . yes
C26 C33 C34 123.3(4) . . yes
N14 C33 C34 120.1(4) . . yes
C39 C34 C35 119.5(4) . . yes
C39 C34 C33 121.7(4) . . yes
C35 C34 C33 118.8(4) . . yes
C34 C35 C36 120.8(5) . . yes
C37 C36 C35 120.1(5) . . yes
C36 C37 C38 120.7(5) . . yes
C37 C38 C39 120.3(5) . . yes
C34 C39 C38 118.6(5) . . yes
N14 C40 C41 125.9(4) . . yes
C48 C41 C42 119.5(4) . . yes
C48 C41 C40 123.0(4) . . yes
C42 C41 C40 117.5(4) . . yes
C43 C42 C41 121.9(4) . . yes
C42 C43 C44 119.6(5) . . yes
C45 C44 C43 119.9(4) . . yes
C44 C45 O7 125.2(4) . . yes
C44 C45 C48 122.6(4) . . yes
O7 C45 C48 112.1(4) . . yes
O7 C46 C47 106.7(6) . . yes
O5 C48 C41 125.4(4) . . yes
O5 C48 C45 118.3(4) . . yes
C41 C48 C45 116.3(4) . . yes
O9 C49 C50 118.0(4) . . yes
O9 C49 C56 125.1(4) . . yes
C50 C49 C56 116.9(4) . . yes
O11 C50 C53 125.9(4) . . yes
O11 C50 C49 113.1(4) . . yes
C53 C50 C49 121.0(4) . . yes
O11 C51 C52 107.4(5) . . yes
C50 C53 C54 121.1(4) . . yes
C55 C54 C53 119.8(5) . . yes
C54 C55 C56 122.0(4) . . yes
C55 C56 C57 118.2(4) . . yes
C55 C56 C49 119.1(4) . . yes
C57 C56 C49 122.7(4) . . yes
N15 C57 C56 127.0(4) . . yes
C65 C58 N15 116.1(4) . . yes
C65 C58 C59 123.0(4) . . yes
N15 C58 C59 120.4(4) . . yes
C64 C59 C60 118.5(4) . . yes
C64 C59 C58 118.9(4) . . yes
C60 C59 C58 122.6(4) . . yes
C61 C60 C59 119.5(5) . . yes
C62 C61 C60 120.2(5) . . yes
C63 C62 C61 120.4(5) . . yes
C62 C63 C64 120.3(5) . . yes
C63 C64 C59 121.0(5) . . yes
C58 C65 N16 117.0(4) . . yes
C58 C65 C66 122.9(4) . . yes
N16 C65 C66 120.1(4) . . yes
C71 C66 C67 118.7(4) . . yes
C71 C66 C65 121.1(4) . . yes
C67 C66 C65 120.2(4) . . yes
C68 C67 C66 119.4(5) . . yes
C69 C68 C67 121.0(5) . . yes
C68 C69 C70 120.8(5) . . yes
C69 C70 C71 118.6(5) . . yes
C66 C71 C70 121.5(5) . . yes
N16 C72 C73 126.1(4) . . yes
C72 C73 C74 118.0(4) . . yes
C72 C73 C80 123.9(4) . . yes
C74 C73 C80 118.1(4) . . yes
C75 C74 C73 122.3(5) . . yes
C74 C75 C76 119.7(5) . . yes
C77 C76 C75 120.6(5) . . yes
C76 C77 O12 125.9(4) . . yes
C76 C77 C80 122.1(5) . . yes
O12 C77 C80 112.0(4) . . yes
O12 C78 C79 106.7(6) . . yes
O10 C80 C77 119.1(4) . . yes
O10 C80 C73 123.8(4) . . yes
C77 C80 C73 117.1(4) . . yes
N86 C84 C85 179.6(8) . . yes
 
_refine_diff_density_max     .606 
_refine_diff_density_min    -.459 
_refine_diff_density_rms     .068 

#-------------------------------------------------------------------------


_publ_contact_author                                                   #ActaC
; Dr. Masanobu Tsuchimoto
  Department of Chemistry
  Faculty of Science and Technology
  Keio University
  Hiyoshi 3-14-1, Kohoku-ku
  Yokohama, 223
  Japan
;
_publ_contact_letter                                                   #ActaC
; Please consider this CIF submission for publication
  in Inorganic Chemistry.
;

_publ_contact_author_phone          '(81) 45 563 1141 ext 3913'        #ActaC
_publ_contact_author_fax            '(81) 45 563 5967'                 #ActaC
_publ_contact_author_email                                             #ActaC
; tmoto@chem.keio.ac.jp
;

loop_
_publ_author_name                                                      #ActaC
_publ_author_address                                                   #ActaC

 'Tsuchimoto, Masanobu'                                                       
; Department of Chemistry
  Faculty of Science and Technology
  Keio University
  Hiyoshi 3-14-1, Kohoku-ku
  Yokohama, 223
  Japan
;

_publ_section_title                                                    #ActaC
;
Thermal Dehydrogenation of Oxovanadium(IV) Complexes with Schiff
Base Ligands Derived from meso-1,2-Diphenyl-1,2-ethanediamine in the
Solid State
;
